# Supplementary material for: Structural basis for differential recognition of phosphohistidine-containing peptides by 1-pHis and 3-pHis monoclonal antibodies
Source: PubMed Central journal article supplement (PMC8017925; doi:10.1073/pnas.2010644118), 2021-02-05
Supplement: pnas.2010644118.sapp.pdf [file pnas.2010644118.sapp.pdf]

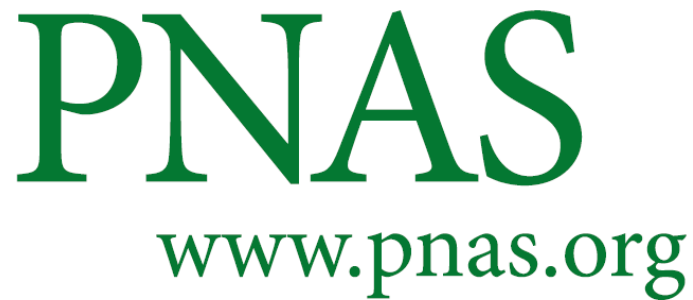

**Supplementary Information for**

**Structural basis for differential recognition of phosphohistidine-containing peptides by 1-pHis and 3-pHis monoclonal antibodies**

Rajasree Kalagiri<sup>a</sup>, Robyn L. Stanfield<sup>b</sup>, Jill Meisenhelder<sup>a</sup>, James J. La Clair<sup>c,d</sup>, Stephen R. Fuhs<sup>a</sup>, Ian A. Wilson<sup>b,e</sup>, Tony Hunter<sup>a,\*</sup>

<sup>a</sup>Molecular and Cell Biology Laboratory, Salk Institute for Biological Studies, La Jolla, CA 92037, United States.

<sup>b</sup>Department of Integrative Structural and Computational Biology, The Scripps Research Institute, La Jolla, CA 92037, United States.

<sup>c</sup>Department of Chemistry and Biochemistry, University of California, San Diego, La Jolla, CA 92093, United States.

<sup>d</sup>Jack H. Skirball Center for Chemical Biology and Proteomics, Salk Institute for Biological Studies, La Jolla, CA 92037, United States.

<sup>e</sup>The Skaggs Institute for Chemical Biology, The Scripps Research Institute, La Jolla, CA 92037, United States.

\*Correspondence should be addressed to T.H.

**Email:** [hunter@salk.edu](mailto:hunter@salk.edu)

**This PDF file includes:**

SI methods and materials

Figures S1 to S11

Tables S1 to S9

SI References

## Supplementary appendix

### Supplementary methods and materials

**Peptide Synthesis.** Peptides used for the crystallization were synthesized at Sanofi as described in Fuhs et al. (1). Peptides used in the DSF and BLI experiments were synthesized by the Salk Peptide Synthesis Core. These peptides were N-terminally biotinylated and C-terminally amidated. They were synthesized using standard Fmoc chemistry on a Gyros Protein Technologies Tribute peptide synthesizer with UV monitoring. Following the deprotection, peptides were analyzed by mass spectrometry and analytical HPLC by the Proteomics Core at Salk. The peptides were HPLC purified to 99% purity by 21<sup>st</sup> Century Biochemicals, Inc. The Fmoc-pTza's were synthesized at 10 g scale for incorporation into the peptides.

**Phosphoramidation reaction.** The small molecule phosphate donor phosphoramidate was used to phosphorylate the peptides containing His (Table S2). Phosphoramidate was synthesized based on Wei and Matthew's method (2) and stored in a desiccator. 20 nanomoles of peptides were added to one micromole of the phosphoramidate in 50 mM Hepes pH 8.0 and 150 mM NaCl buffer. This mixture was incubated for 8 h at 23 °C.

**Immunoaffinity purification of pHis peptides.** Individual immunoaffinity columns were prepared for the two pHis isoforms. 125 µg of 1-pHis IgGs (equal mixture of SC1-1 and SC50-3) and 125 µg of 3-pHis IgGs (equal mixture of SC39-4, SC44-8 and SC56-2) were added separately to 500 µL of Protein A agarose beads in the presence of 5 mM BS<sup>3</sup> crosslinker and incubated for 45 min on the Nutator. Excess crosslinker was removed and columns were washed thoroughly using 50 mM Hepes pH 8.0 with 150 mM NaCl. Peptides from the overnight phosphoramidation reaction were added to the affinity column containing either 1-pHis IgGs or 3-pHis IgGs. The incubation was continued for one hour at RT. The supernatant was removed, and the beads were washed thrice with the Hepes buffer. Each phosphorylated peptide was eluted from the corresponding isomer affinity column using 600 µL of 2 M imidazole and the eluate was immediately used for the Biolayer interferometry assays.

**<sup>1</sup>H NMR of ACLYana peptide.** A mixture of 5 mM ACLYana peptide and 250 mM phosphoramidate in 20 mM *d*<sub>18</sub>-Hepes, pH 8.0, 50 mM NaCl in D<sub>2</sub>O was incubated at 23 °C and monitored over the course of 29 h. Each time point collected from a 50 µL volume of which 35 µL was transferred to a 1.7 mm NMR capillary tube and <sup>1</sup>H NMR data were acquired on Bruker Advance III 600 equipped with a 1.7 mm cryoprobe. Chemical shifts (ppm) were referenced using

the corresponding solvent signals ( $\delta_{\text{H}}$  4.79 for D<sub>2</sub>O). Delay time (d1) was set to 5 to ensure accurate integrations. The NMR spectra were processed using Mestrenova (Mnova 11.0 Mestrelab Research).

**pHis IgG commercial antibodies.** Some of the pHis IgG antibodies are commercially available from EMD Millipore. Anti-N1-Phosphohistidine (1-pHis) antibody- SC1-1 (MABS1330), Anti-N1-Phosphohistidine (1-pHis) antibody- SC50-3 (MABS1341), Anti-N3-Phosphohistidine (3-pHis) antibody- SC39-6 (MABS1351) and, Anti-N3-Phosphohistidine (3-pHis) antibody- SC56-2 (MABS1352).



## Supplementary figures

Fig. S1.

|           | CDR1                                           | CDR2                                 | CDR3                                                 |
|-----------|------------------------------------------------|--------------------------------------|------------------------------------------------------|
| SC1-1 VH  | 31-GHGVI-35                                    | 50-SAGAYGRIYYASWAKS-65               | 95-RSDVGT SVGFDS-102                                 |
| SC50-3 VH | 31-GYGVV-35                                    | 50-SAGAYGRIYYPNWARS-65               | 95-RTNVST SVGFDS-102                                 |
| SC1-1 VL  | 24-QASESVYSNNRLS-34                            | 50-LVSTLAS-56                        | 89-VGYKSS TTDGLA-97                                  |
| SC50-3 VL | 24-QASETVY-NNRLS-34                            | 50-LVSTLAS-56                        | 89-VGYKSS TTDGLA-97                                  |
| SC39-4 VH | 31-RY <sup>*</sup> NG-35                       | 50-WIPFRGSLKYATWATG-65               | 95-SSDGF--DL-102                                     |
| SC44-8 VH | 31-SY <sup>*</sup> FS-35                       | 50-VLTAGGR <sup>*</sup> AFYASWAKS-65 | 95-LSSG <sup>*</sup> PVAI-102                        |
| SC56-2 VH | 31-SY <sup>*</sup> FS-35                       | 50-VLHANGRAYYATWAKS-65               | 95-IGSVSDVAI-102                                     |
| SC39-4 VL | 24-QASR--DTGDGLI-34                            | 50-KASTVAS-56                        | 89-HS <sup>*</sup> NFYNRWTYG-----NA-97               |
| SC44-8 VL | 24-QSSQSVWRNK <sup>#</sup> LA-34               | 50-AIATLDS-56                        | 89-VG <sup>#</sup> HYGSENDAY-----YA-97               |
| SC56-2 VL | 24-QSSESIY <sup>#</sup> NKN <sup>#</sup> LA-34 | 50-SISTLAS-56                        | 89-VG <sup>#</sup> YYSGGYYYSGSAAY <sup>#</sup> YA-97 |

**Fig. S1.** Depiction of pHis mAbs CDR sequence variability and physical contacts with pTza peptide. The sequence of the CDR regions of heavy and light chains of pHis mAbs. The sequence variability is high among the 3-pHis mAbs (SC39-4, SC44-8 and SC56-2) compared to the 1-pHis mAbs (SC1-1 and SC50-3). The grey shaded residues and grey shade with boxed residues make direct and water-mediated interactions with the phosphate moiety respectively, the dark beige shaded and asterisk signed residues interact with the triazolyl moiety, and the pink shaded and pound signed residues interact with the peptide. The ‘nest’ motif in CDRH3 region of SC44-8 is boxed. Most of the interactions are through hydrogen bonds, which are listed in SI Appendix, Table S5. The hydrogen bonds are measured using the HBPLUS program (3).

**Fig. S2.**

(A)

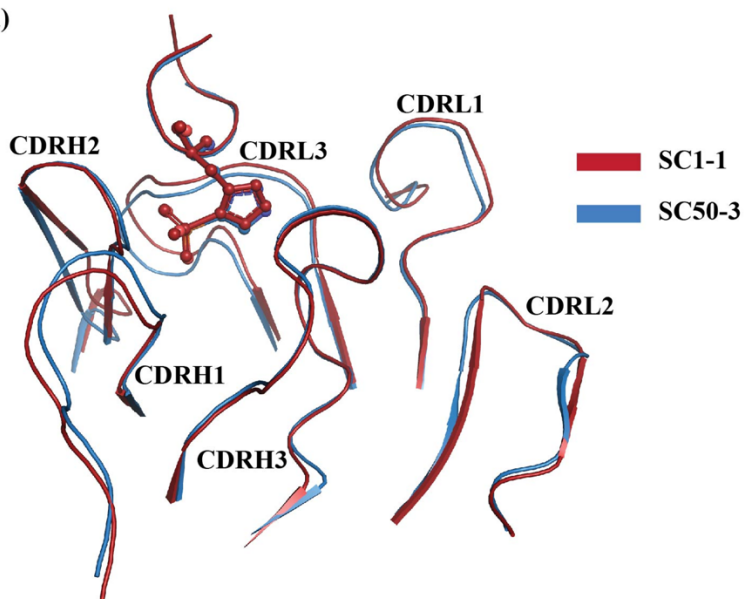

(B)

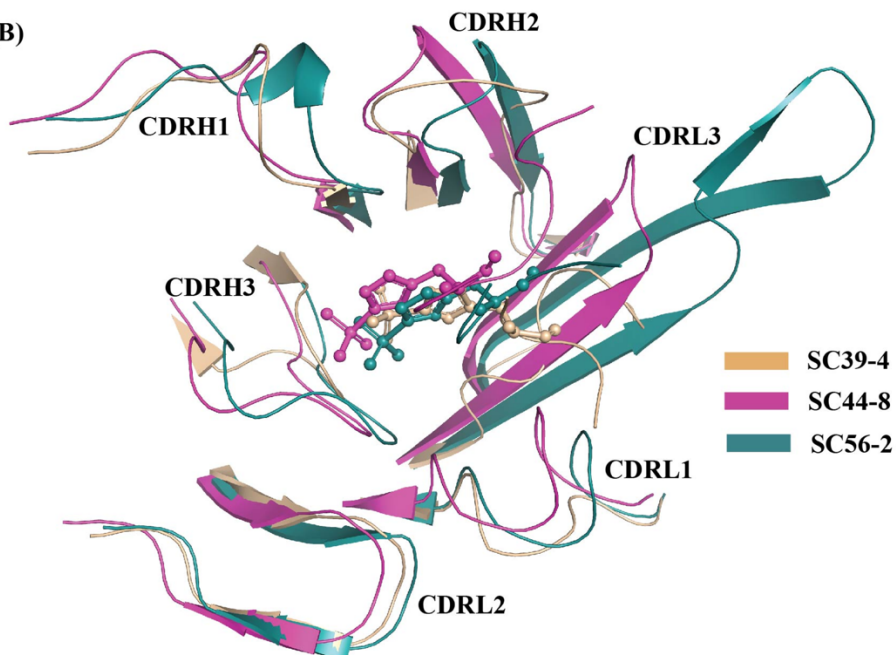

**Fig. S2.** Structural superposition of pHis Fabs on the C $\alpha$  carbon. (A) Overlay of six CDRs of 1-pHis Fabs, SC1-1 and SC50-3, on their C $\alpha$  carbon backbone. The RMSDs of CDRs and the bound peptide are very low. (B) Overlay of six CDRs of 3-pHis Fabs (SC39-4, SC44-8 and SC56-2) shows higher RMSDs. The high CDR variability in CDRL3 is reflected in the high RMSDs in 3-pHis Fabs.

**Fig. S3.**

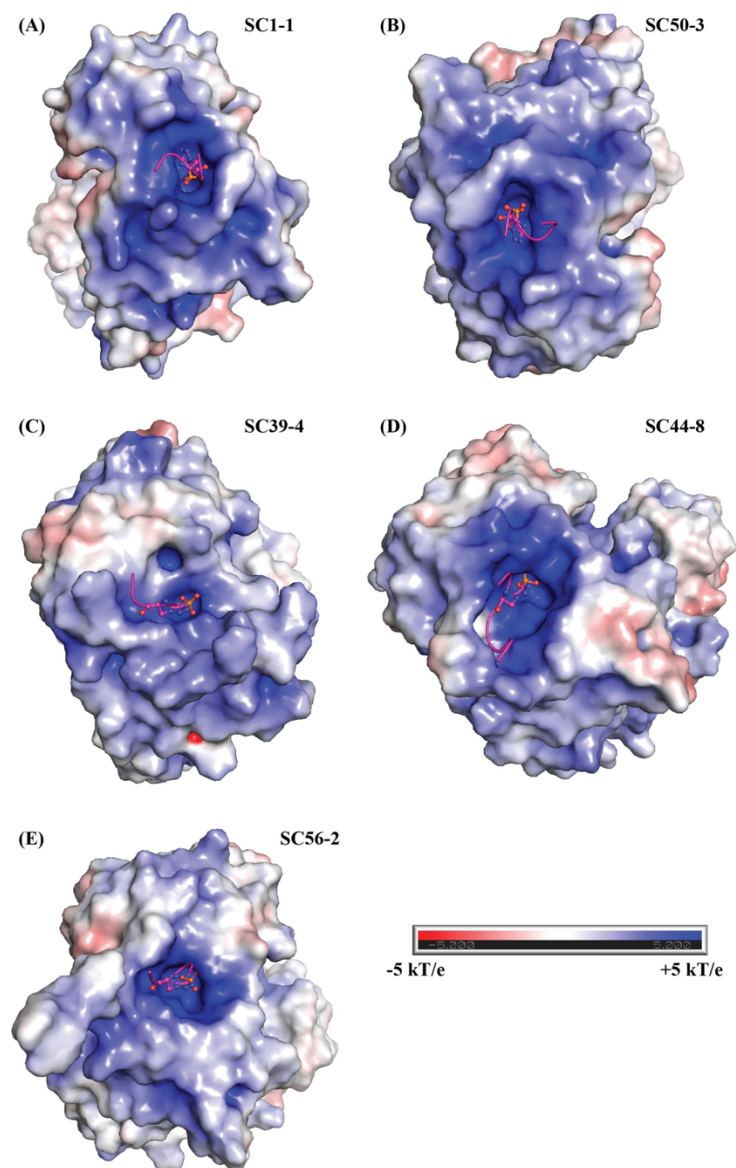

**Fig. S3.** Electrostatic surface representation of pHis Fabs. The electrostatic potential on the surface of the pHis Fabs, SC1-1 (A), SC50-3 (B), SC39-4 (C), SC44-8 (D) and SC56-2 (E), bound to cognate peptides (represented pink) indicate that a strongly positive electrostatic potential of the binding site facilitates the recognition of the phosphate moiety. This surface representation of the pHis Fabs was generated using the Adaptive Poisson-Boltzmann Solver (APBS) in PyMol. The red- and blue-colored regions show the regions with negative (red) and positive (blue) electrostatic potential contoured from  $-5$  to  $+5$  kT/e, respectively.

**Fig. S4.**

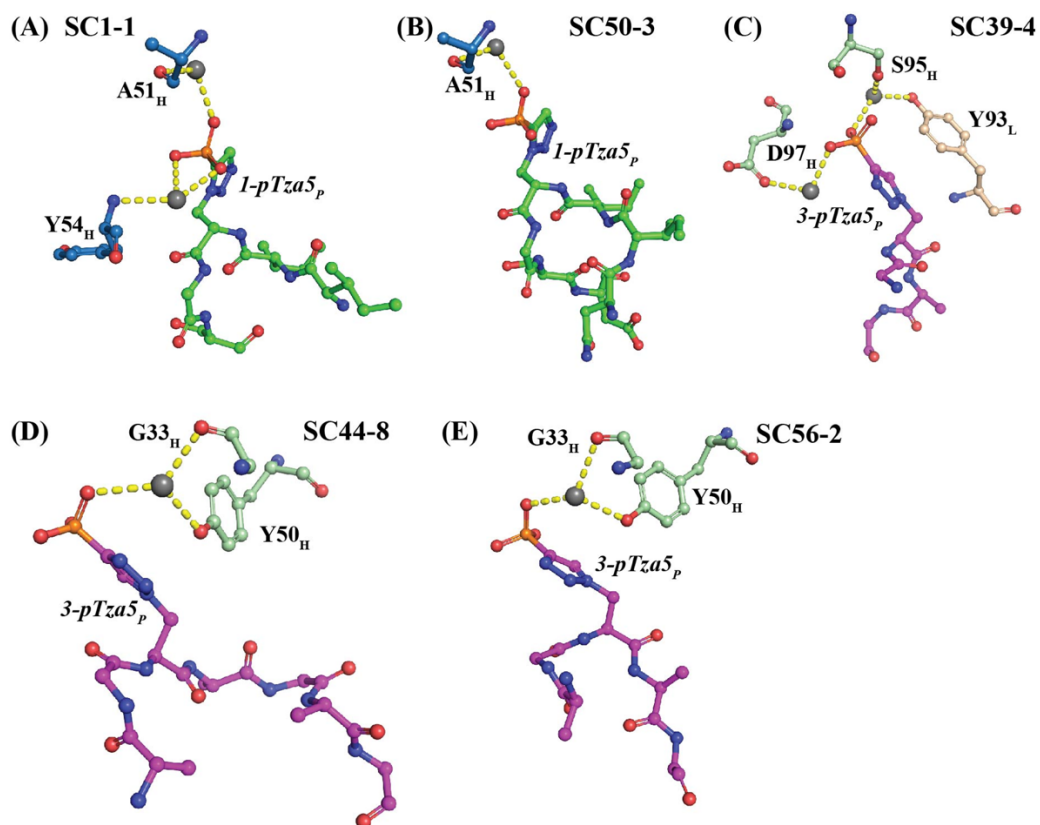

**Fig. S4.** Water-mediated interactions of the phosphate moiety of the peptide with pHis Fabs. (A) Ala51 and Tyr54 in CDRH2 of SC1-1 are involved in hydrogen bonding with the phosphate in the peptide through two water molecules (represented in grey). (B) SC50-3 makes only one water-mediated interaction with the phosphate moiety through Ala51. The water which mediates interaction between Ala51 and the phosphate is conserved in 1-pHis Fabs. (C) Ser95 and Asp97 in CDRH3 and Tyr93 in CDRL3 make three interactions through two water molecules. (D) SC44-8 and (E) SC56-2 makes two interactions with Gly33 in CDRH1 and Tyr50 in CDRH2 through one water molecule which is conserved among these two Fabs.

**Fig. S5.**

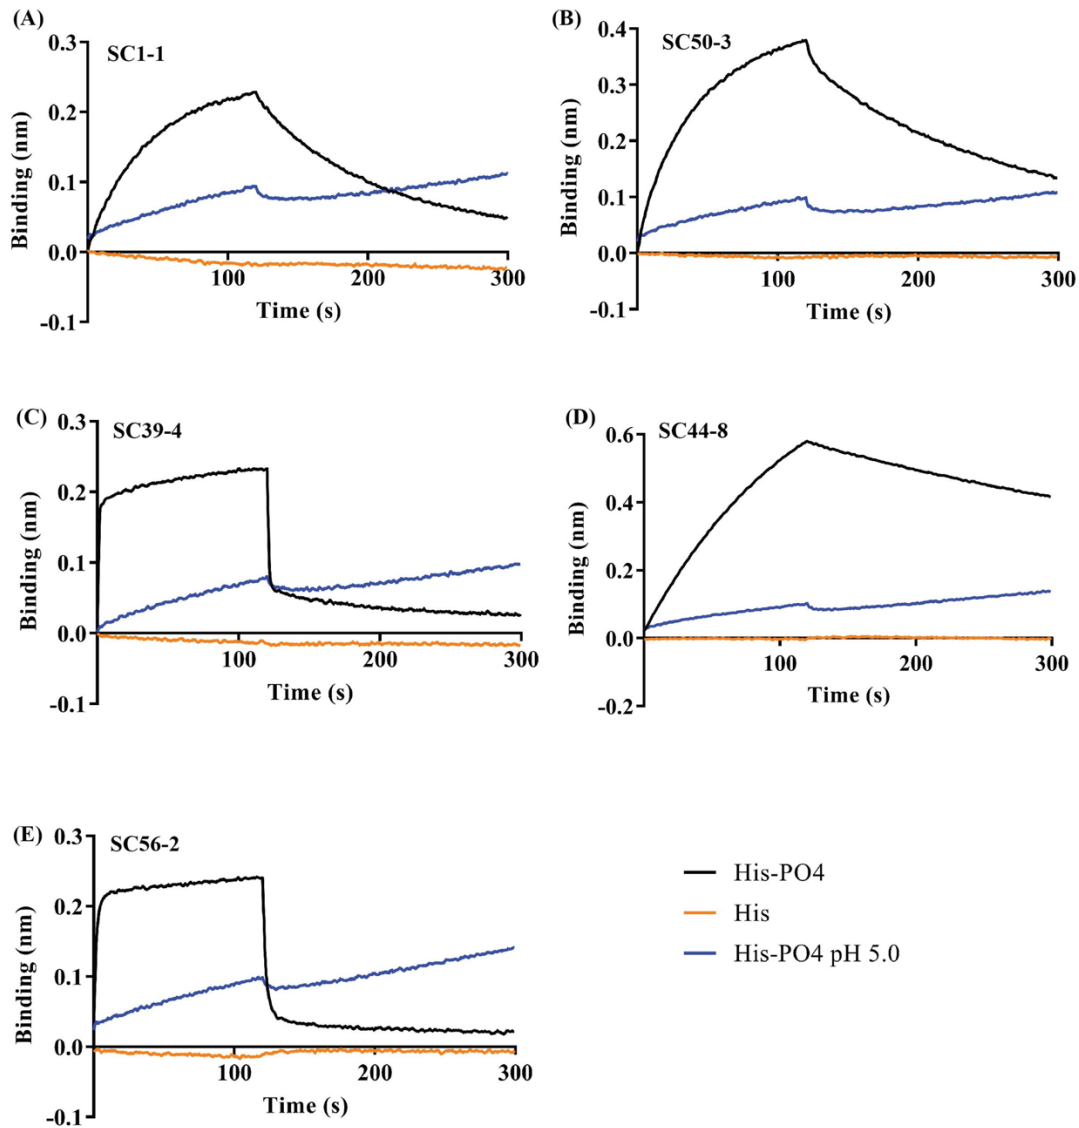

**Fig. S5.** pHis versus His discrimination by pHis Fabs. The BLI plots represent the interaction of pHis Fabs, SC1-1 (A), SC50-3 (B), SC39-4 (C), SC44-8 (D), and SC56-2 (E), with pHis peptides over non-phosphorylated histidine peptides. Binding of pHis Fabs is lost with pHis peptides at acidic pH (pH 5.0).

**Fig. S6.**

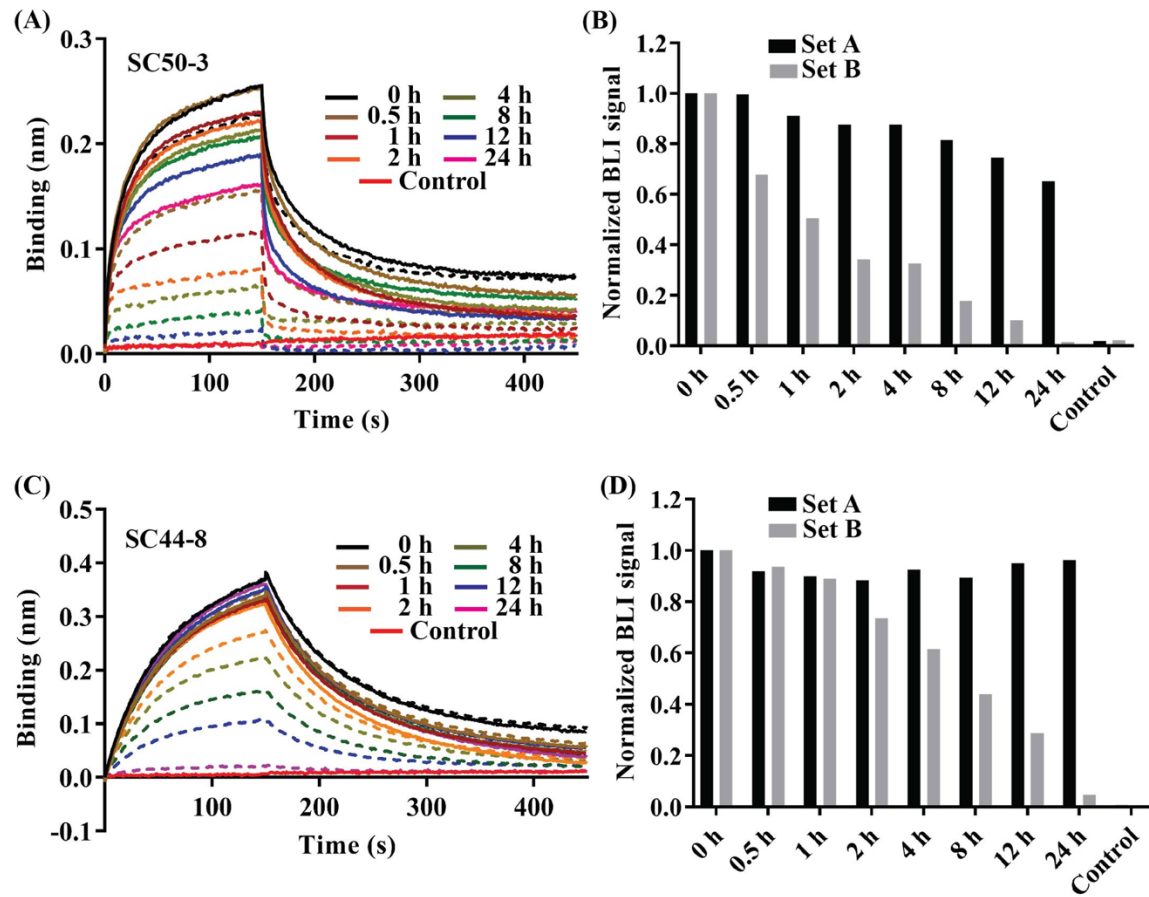

**Fig. S6.** Stability of 1- and 3-pHis peptides in the presence of pHis mAbs. In the BLI experiment, analytes were SC50-3 (*A and B*) and SC44-8 (*C and D*) Fabs and ligand was the ACLYana peptide. Prior to the experiment, the peptide was phosphorylated with phosphoramidate and divided into two sets - set A and set B. The set A peptide was incubated with 1- and 3-pHis mAbs separately for extended periods of time (0 - 24 h) and set B was not incubated with pHis mAbs. The ACLYana-pHis peptide incubated with the mixture of 1-pHis IgGs (*A*, continuous lines) and 3-pHis IgGs (*C*, continuous lines) has the higher signal intensity at all time points compared to ACLYana-pHis peptide that did not undergo extended periods of incubation with pHis IgGs (discontinuous lines). The BLI signal intensity at the end of association phase was used to compare the rate of hydrolysis with (set A) and without incubation with pHis mAbs (set B). The signal intensities were normalized to the 0 h (*B and D*). The unphosphorylated peptide was used as a negative control. The data indicate that the pHis mAbs stabilize the pHis peptides by decreasing the rate of dephosphorylation. In the absence of pHis mAb incubation, 1-pHis peptide hydrolyzed faster than 3-pHis peptide.



**Fig. S7.**

**(A)**

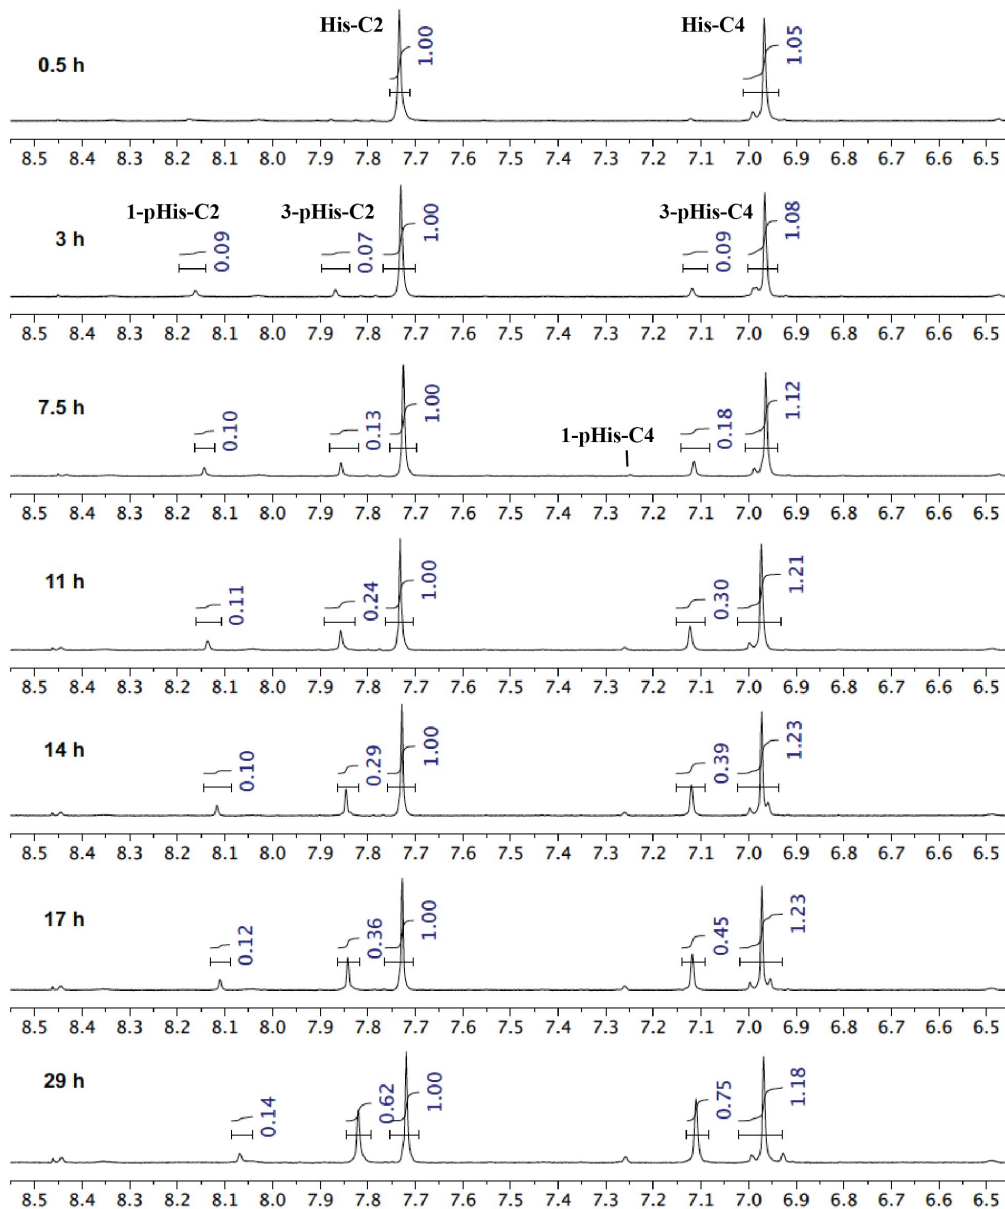

**(B)**

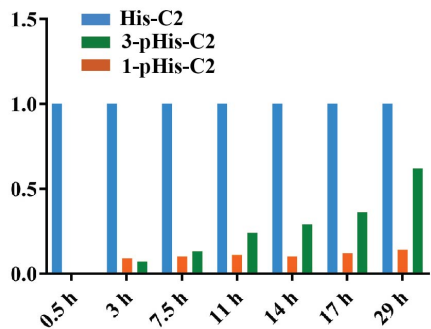

**(C)**

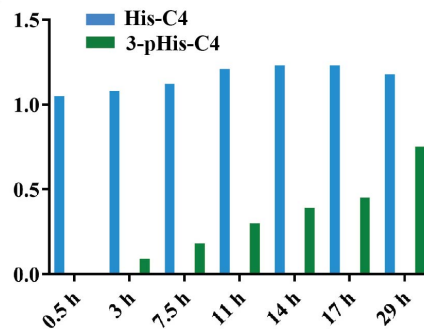

**Fig. S7. <sup>1</sup>H-NMR time course analysis of phosphorylation of ACLYana peptide.** (A) <sup>1</sup>H-NMR spectra collected at designated time points. Over the course of the reaction, the proton at C2 observed at 7.7 ppm shifts to 7.85 ppm and 8.15 ppm upon phosphorylation at the respective 3-pHis and 1-pHis positions. Likewise, the proton at C4 also shifted from 6.95 ppm to 7.25 ppm and 7.10 ppm when undergoing phosphorylation at 1-pHis and 3-pHis, respectively. There was no observable formation of 1,3-diphosphohistidine. The integrated peaks of the C2 (B) and C4 (C) imidazole ring protons peaks demonstrate time-dependent formation of ACLYana-1-pHis and ACLYana-3-pHis.



**Fig. S8.**

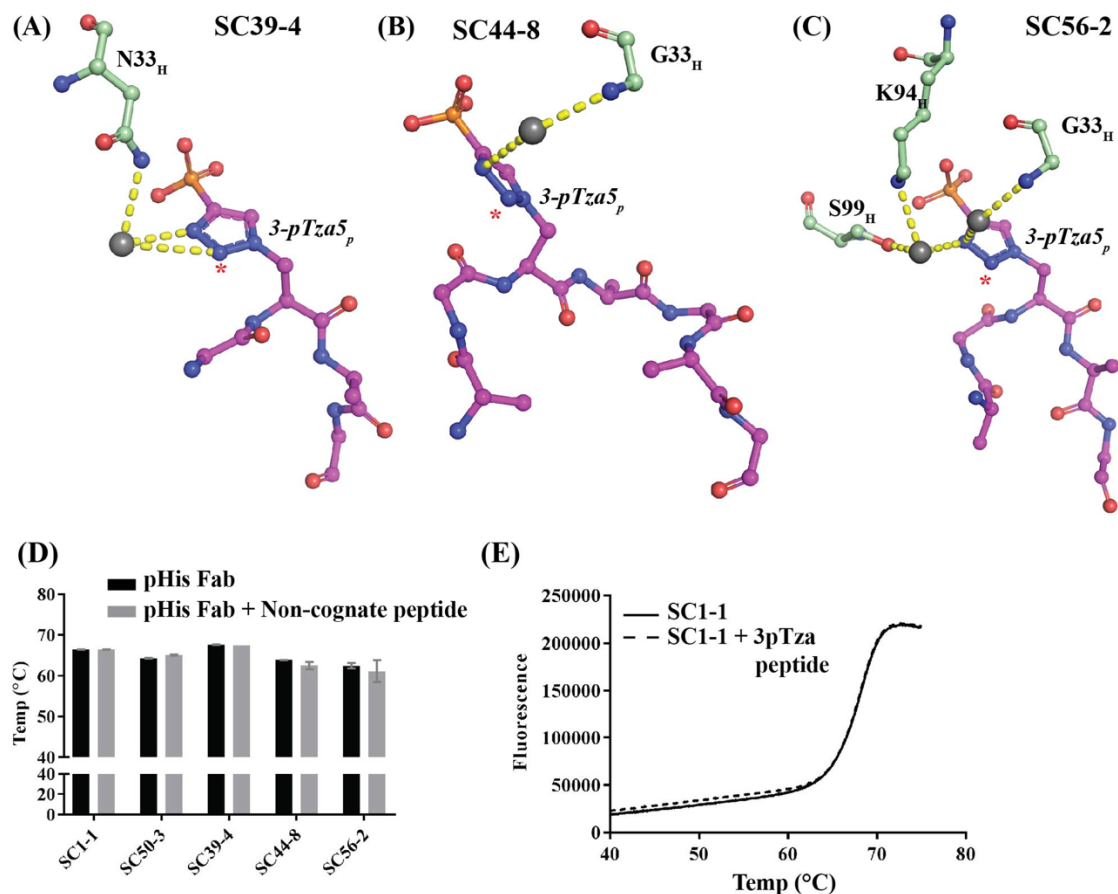

**Fig. S8.** Isomer specificity of pHis Fabs. 1-pHis Fabs do not make any water-mediated interactions with triazolyl group. (A) Asn33 in CDRH1 of SC39-4 makes two interactions with triazolyl group through one water molecule (represented in grey). (B) SC44-8 forms hydrogen bonds between Gly33 in CDRH1 to triazolyl group via one water molecule. (C) Along with Gly33 in CDRH1, Lys94 and Ser99 in CDRH3 from SC56-2 forms interactions with the triazolyl group through water molecules. The atoms corresponding to nitrogens on the imidazole, which are free to undergo hydrogen bonding, are starred. These interactions may form when pHis mAbs bind to pHis peptides. (D) The  $T_m$  derived from the DSF analysis of pHis Fabs in presence of their non-cognate pTza peptides shows that there is no change in thermal melt temperature indicating minimum to no cross reactivity across isoform-specific antibodies. (E) A representative thermal melt plot of SC1-1 in presence and absence of ACLYana-3-pTza peptide (noncognate).

**Fig. S9**

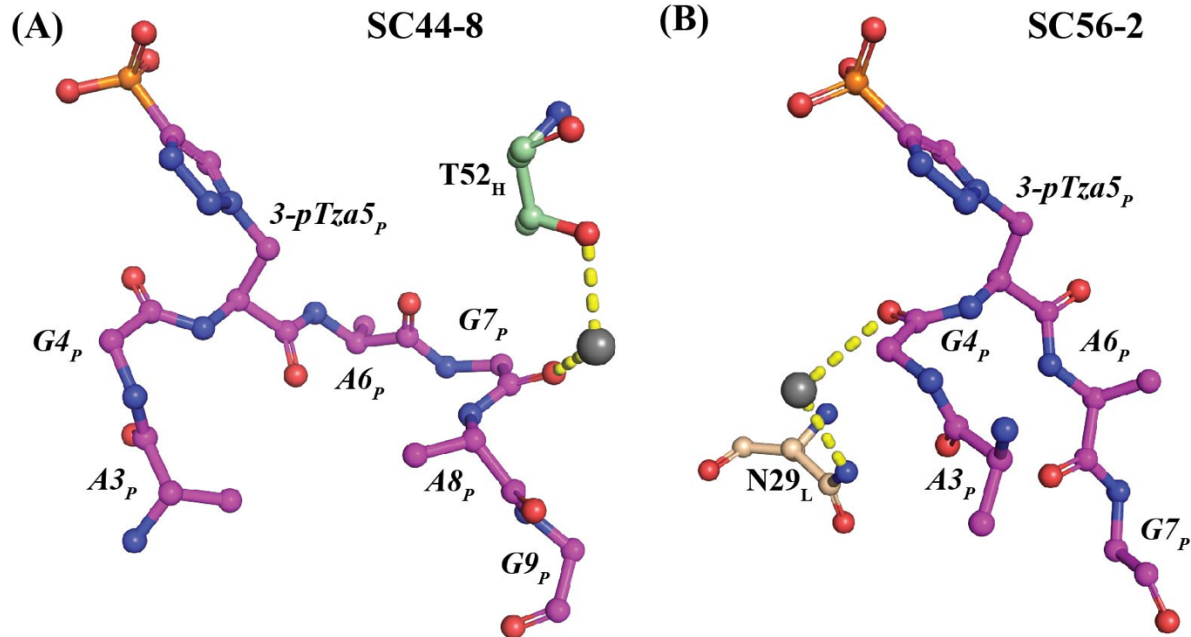

**Fig. S9.** Water-mediated interactions of peptides with pHis Fabs. (A) SC44-8 makes one water-mediated interaction (represented in grey) with the peptide backbone through Thr52 in CDRH2. (B) SC56-2 also makes one water-mediated interaction between Asn29 in CDRL1 with the peptide backbone. SC1-1, SC50-3 and SC39-4 do not form any water-mediated interactions as there are no ordered water molecules in the CDR region and most of the peptide is solvent exposed.

**Fig. S10.**

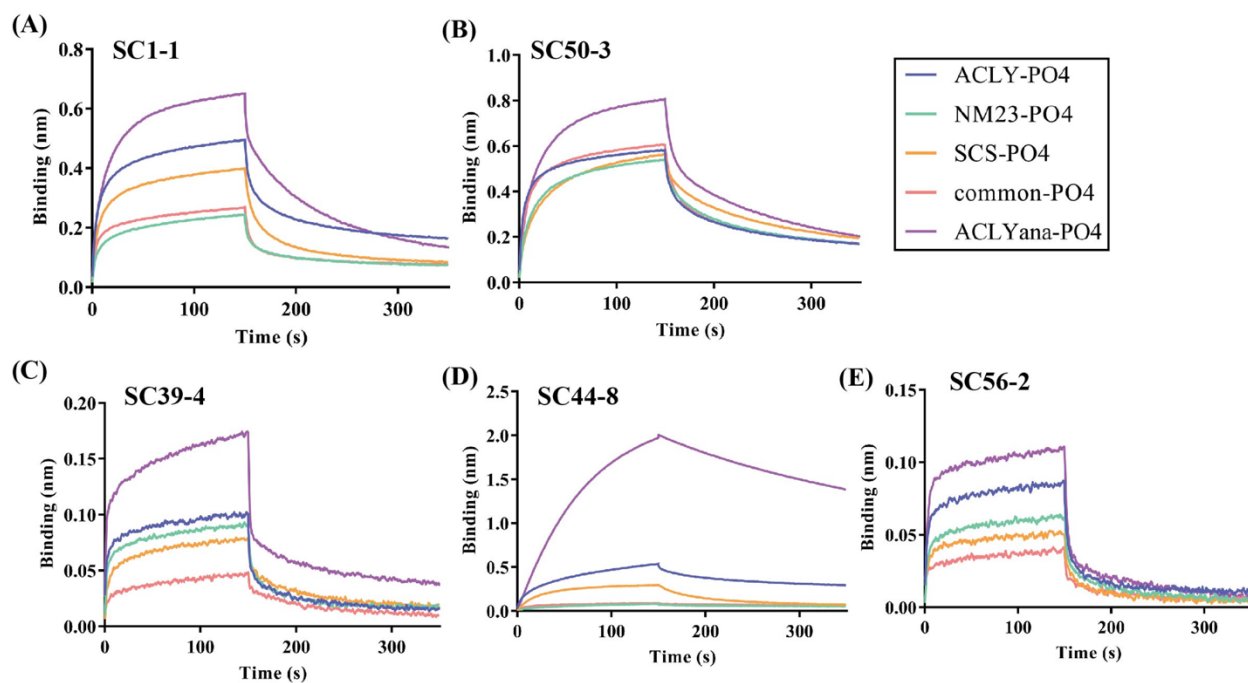

**Fig. S10.** Sequence independence property of pHis Fabs. BLI studies on SC1-1 (A), SC50-3 (B), SC39-4 (C) and SC56-2 (E) in the presence of different peptides shows that there is a minimal signal intensity difference with different peptides indicating that these Fabs can bind any of the peptides tested with a pHis modification. SC44-8 (D) shows a maximum signal intensity with peptides with a GpHAGA motif (ACLYana, ACLY and SCS) compared to other peptide sequences (NM23 and Common-His peptide). The corresponding affinity values are tabulated in Table S7.

**Fig. S11.**

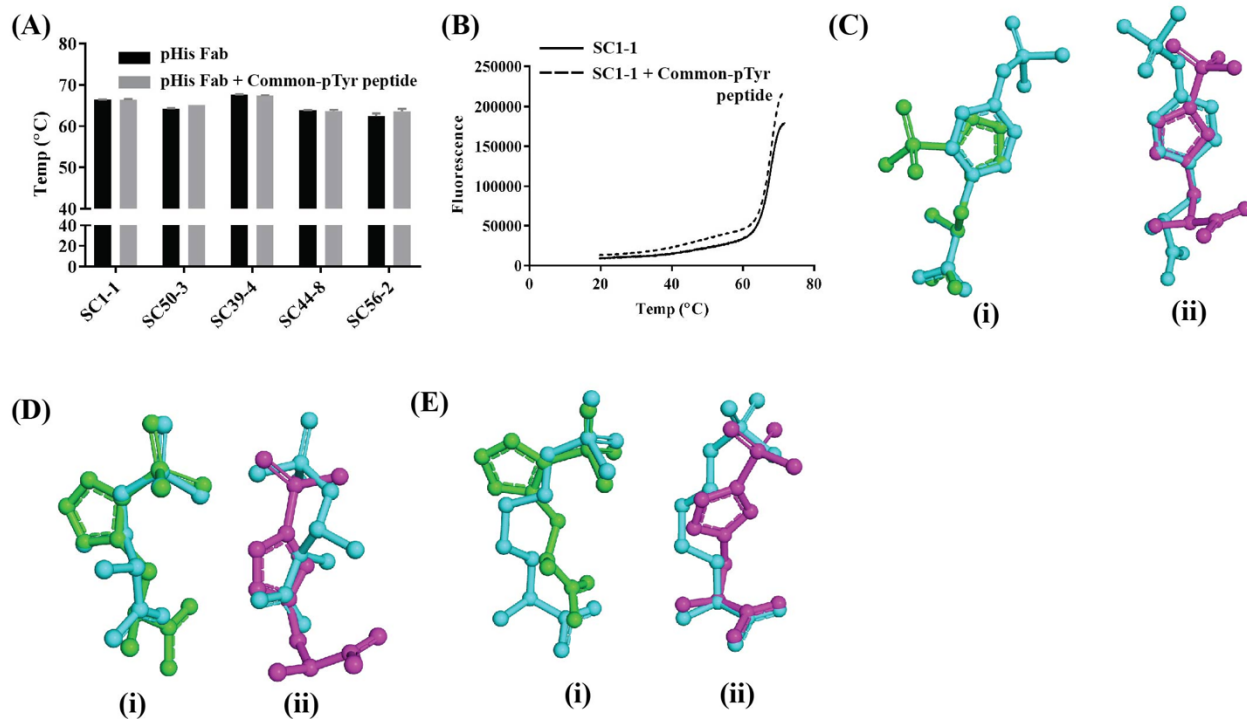

**Fig. S11.** pHis Fabs non cross-reactivity to the other phosphoamino acid modifications. (A) The DSF analysis of pHis Fabs in presence of the pTyr peptide shows that the  $T_m$  of the antibodies do not change indicating minimum to no cross reactivity to pTyr modification. (B) Representative thermal melt plot of SC1-1 in presence and absence of pTyr peptide. A 3-D structure-based ligand alignment using the LS-Align program- 1-pHis (green) (i) and 3-pHis (magenta) (ii) overlay on cyan colored pTyr (C), pThr (D) and pLys (E).

**Supplementary tables**  
**Table S1. X-ray data collection and refinement statistics**

| Ligand                                                                                                                                                                                                                                                                                                                                                                                                                                                                                                                                                                                                                                                                                                                                                                                                                                 | SC1-1                                | SC50-3                                        | SC39-4                                        | SC44-8                              | SC56-2                            |
|----------------------------------------------------------------------------------------------------------------------------------------------------------------------------------------------------------------------------------------------------------------------------------------------------------------------------------------------------------------------------------------------------------------------------------------------------------------------------------------------------------------------------------------------------------------------------------------------------------------------------------------------------------------------------------------------------------------------------------------------------------------------------------------------------------------------------------------|--------------------------------------|-----------------------------------------------|-----------------------------------------------|-------------------------------------|-----------------------------------|
| Data collection                                                                                                                                                                                                                                                                                                                                                                                                                                                                                                                                                                                                                                                                                                                                                                                                                        | RNII-1-pTza-GSDS                     | RNII-1-pTza-GSDS                              | AGAG-3-pTza-AGAG                              | AGAG-3-pTza-AGAG                    | AGAG-3-pTza-AGAG                  |
| Beamline                                                                                                                                                                                                                                                                                                                                                                                                                                                                                                                                                                                                                                                                                                                                                                                                                               | APS 23-ID-D                          | APS 23-ID-D                                   | ALS 5.0.1                                     | SSRL 12-2                           | APS 23-ID-D                       |
| Wavelength (Å)                                                                                                                                                                                                                                                                                                                                                                                                                                                                                                                                                                                                                                                                                                                                                                                                                         | 1.03315                              | 1.03315                                       | 0.97741                                       | 0.97946                             | 1.03320                           |
| Resolution (Å) <sup>a</sup>                                                                                                                                                                                                                                                                                                                                                                                                                                                                                                                                                                                                                                                                                                                                                                                                            | 46.7-1.65                            | 49.6-2.34                                     | 46.8-1.64                                     | 43.8-2.11                           | 47.9-1.95                         |
| Space group                                                                                                                                                                                                                                                                                                                                                                                                                                                                                                                                                                                                                                                                                                                                                                                                                            | P2                                   | P2 <sub>1</sub> 2 <sub>1</sub> 2 <sub>1</sub> | P2 <sub>1</sub> 2 <sub>1</sub> 2 <sub>1</sub> | P2 <sub>1</sub>                     | P4 <sub>2</sub> 2 <sub>1</sub> 2  |
| Unit cell (Å)<br>(°)                                                                                                                                                                                                                                                                                                                                                                                                                                                                                                                                                                                                                                                                                                                                                                                                                   | 86.8, 72.3, 156.7<br>90°, 95.8°, 90° | 89.8, 199.7, 204.9<br>90°, 90°, 90°           | 67.1, 86.1, 167.3<br>90°, 90°, 90°            | 50.4, 66.3, 58.6<br>90°, 94.9°, 90° | 121.1, 121.1, 78<br>90°, 90°, 90° |
| Total reflections                                                                                                                                                                                                                                                                                                                                                                                                                                                                                                                                                                                                                                                                                                                                                                                                                      | 1,388,099                            | 2,009,178                                     | 524,299                                       | 69,747                              | 258,589                           |
| Unique reflections                                                                                                                                                                                                                                                                                                                                                                                                                                                                                                                                                                                                                                                                                                                                                                                                                     | 230,655                              | 155,051                                       | 116,971                                       | 21,391                              | 42,281                            |
| Multiplicity                                                                                                                                                                                                                                                                                                                                                                                                                                                                                                                                                                                                                                                                                                                                                                                                                           | 6.0(5.1)                             | 13.0(11.2)                                    | 4.5(4.4)                                      | 3.3(2.8)                            | 6.1(6.2)                          |
| Completeness (%)                                                                                                                                                                                                                                                                                                                                                                                                                                                                                                                                                                                                                                                                                                                                                                                                                       | 100.0(99.5)                          | 100.0(100.0)                                  | 99.1(98.0)                                    | 95.8(79.2)                          | 99.1(99.8)                        |
| Mean (I)/σ <sub>I</sub>                                                                                                                                                                                                                                                                                                                                                                                                                                                                                                                                                                                                                                                                                                                                                                                                                | 14.5(1.0)                            | 15.7(1.3)                                     | 13.3(1.1)                                     | 7.6(1.6)                            | 10.6(1.1)                         |
| R <sub>merge</sub> <sup>b</sup> (%)                                                                                                                                                                                                                                                                                                                                                                                                                                                                                                                                                                                                                                                                                                                                                                                                    | 11.6(130)                            | 18.1(169)                                     | 8.8(151)                                      | 18.5(83.5)                          | 15.2(129)                         |
| R <sub>meas</sub> <sup>c</sup> (%)                                                                                                                                                                                                                                                                                                                                                                                                                                                                                                                                                                                                                                                                                                                                                                                                     | 12.6(144)                            | 18.9(177)                                     | 10.0(173)                                     | 22.2(106)                           | 16.5(141)                         |
| R <sub>pim</sub> <sup>d</sup> (%)                                                                                                                                                                                                                                                                                                                                                                                                                                                                                                                                                                                                                                                                                                                                                                                                      | 5.0(61.3)                            | 5.2(52.6)                                     | 4.6(80.5)                                     | 12.1(64.3)                          | 6.3(53.8)                         |
| CC <sub>1/2</sub> <sup>e</sup> (%)                                                                                                                                                                                                                                                                                                                                                                                                                                                                                                                                                                                                                                                                                                                                                                                                     | 85.6(37.4)                           | 85.8(34.4)                                    | 88.6(49.2)                                    | 93.2(32.0)                          | 77.9(30.6)                        |
| <b>Refinement</b>                                                                                                                                                                                                                                                                                                                                                                                                                                                                                                                                                                                                                                                                                                                                                                                                                      |                                      |                                               |                                               |                                     |                                   |
| Refinement resolution (Å) <sup>a</sup>                                                                                                                                                                                                                                                                                                                                                                                                                                                                                                                                                                                                                                                                                                                                                                                                 | 46.7-1.65                            | 49.6-2.34                                     | 46.8-1.64                                     | 43.8-2.11                           | 47.9-1.95                         |
| # reflections in refinement (work/free)                                                                                                                                                                                                                                                                                                                                                                                                                                                                                                                                                                                                                                                                                                                                                                                                | 219,191/11,408                       | 154,787/7,567                                 | 116,780/5,819                                 | 20,413/963                          | 40,140/2,104                      |
| R <sub>work</sub> /R <sub>free</sub> (%)                                                                                                                                                                                                                                                                                                                                                                                                                                                                                                                                                                                                                                                                                                                                                                                               | 19.9/22.6                            | 24.4/26.9                                     | 18.9/22.5                                     | 18.5/23.8                           | 20.0/24.1                         |
| # atoms (Fab/Peptide/Solvent)                                                                                                                                                                                                                                                                                                                                                                                                                                                                                                                                                                                                                                                                                                                                                                                                          | 14,256/160/1027                      | 19,546/292/215                                | 6,432/54/1122                                 | 3,198/27/153                        | 3,213/18/354                      |
| RMS (bonds)                                                                                                                                                                                                                                                                                                                                                                                                                                                                                                                                                                                                                                                                                                                                                                                                                            | 0.007                                | 0.003                                         | 0.022                                         | 0.0139                              | 0.0065                            |
| RMS (angles)                                                                                                                                                                                                                                                                                                                                                                                                                                                                                                                                                                                                                                                                                                                                                                                                                           | 0.95                                 | 0.68                                          | 2.14                                          | 1.95                                | 0.95                              |
| Ramachandran favoured/allowed/outliers (%)                                                                                                                                                                                                                                                                                                                                                                                                                                                                                                                                                                                                                                                                                                                                                                                             | 97.67/2.27/0.06                      | 97.44/2.09/0.46                               | 97.6/2.3/0.1                                  | 96.9/3.1/0                          | 97.2/2.8/0                        |
| Clashscore <sup>f</sup>                                                                                                                                                                                                                                                                                                                                                                                                                                                                                                                                                                                                                                                                                                                                                                                                                | 2.8                                  | 3.2                                           | 1.7                                           | 3.0                                 | 4.24                              |
| Wilson B (Å <sup>2</sup> )                                                                                                                                                                                                                                                                                                                                                                                                                                                                                                                                                                                                                                                                                                                                                                                                             | 20                                   | 42                                            | 20.1                                          | 21                                  | 27                                |
| Average B (Å <sup>2</sup> ) for all atoms/Fab/Peptide/Solvent                                                                                                                                                                                                                                                                                                                                                                                                                                                                                                                                                                                                                                                                                                                                                                          | 26/26.0/35.4/30.3                    | 54/49/66/37                                   | 26/24/25/37                                   | 24/23/30/26                         | 36/35/63/46                       |
| <sup>a</sup> Numbers in parentheses are for highest resolution shell<br><sup>b</sup> $R_{\text{merge}} = \frac{\sum_{\text{hkl}} \sum_{i=1, n}  I_i(\text{hkl}) - \langle I(\text{hkl}) \rangle }{\sum_{\text{hkl}} \sum_{i=1, n} I_i(\text{hkl})}$<br><sup>c</sup> $R_{\text{meas}} = \frac{\sum_{\text{hkl}} \sqrt{(n/n-1) \sum_{i=1, n}  I_i(\text{hkl}) - \langle I(\text{hkl}) \rangle }}{\sum_{\text{hkl}} \sum_{i=1, n} I_i(\text{hkl})}$<br><sup>d</sup> $R_{\text{pim}} = \frac{\sum_{\text{hkl}} \sqrt{(1/n-1) \sum_{i=1, n}  I_i(\text{hkl}) - \langle I(\text{hkl}) \rangle }}{\sum_{\text{hkl}} \sum_{i=1, n} I_i(\text{hkl})}$<br><sup>e</sup> CC <sub>1/2</sub> = Pearson Correlation Coefficient between two random half datasets<br><sup>f</sup> Number of unfavorable all-atom steric overlaps ≥ 0.4Å per 1000 atoms |                                      |                                               |                                               |                                     |                                   |

**Table S2. Sequences of the peptides used in this study**

| No. | Peptide name   | Peptide sequence                       |
|-----|----------------|----------------------------------------|
| 1   | NM23-1-pTza    | Arg-Asn-Ile-Ile-1-pTza-Gly-Ser-Asp-Ser |
| 2   | ACLYana-1-pTza | Ala-Gly-Ala-Gly-1-pTza-Ala-Gly-Ala-Gly |
| 3   | ACLYana-3-pTza | Ala-Gly-Ala-Gly-3-pTza-Ala-Gly-Ala-Gly |
| 4   | ACLYana        | Ala-Gly-Ala-Gly-His-Ala-Gly-Ala-Gly    |
| 5   | ACLY           | Val-Gln-Phe-Gly-His-Ala-Gly-Ala-Cys    |
| 6   | NM23           | Arg-Asn-Ile-Ile-His-Gly-Ser-Asp-Ser    |
| 7   | SCS            | Arg-Arg-Asn-Gly-His-Ala-Gly-Ala-Ile    |
| 8   | Common-His     | Gly-Glu-Gln-Leu-His-Asp-Leu-Asn-Ala    |
| 9   | Common-pTyr    | Gly-Glu-Gln-Leu-pTyr-Asp-Leu-Asn-Ala   |
| 10  | Common-pThr    | Gly-Glu-Gln-Leu-pThr-Asp-Leu-Asn-Ala   |
| 11  | Common-pNLe    | Gly-Glu-Gln-Leu-pNLe-Asp-Leu-Asn-Ala   |
| 12  | Common-Lys     | Gly-Glu-Gln-Leu-Lys-Asp-Leu-Asn-Ala    |

**Table S3. Elbow angles<sup>#</sup> of pHis Fabs measured by RBOW**

| Protomer        | Elbow angle (°) |
|-----------------|-----------------|
| SC1-1 Chain AB  | 159.1           |
| SC1-1 Chain CD  | 151.3           |
| SC1-1 Chain EF  | 150.2           |
| SC1-1 Chain HL  | 158.4           |
| SC50-3 Chain AB | 146.9           |
| SC50-3 Chain CD | 145.9           |
| SC50-3 Chain EF | 150.7           |
| SC50-3 Chain GI | 153.9           |
| SC50-3 Chain JK | 146.1           |
| SC50-3 Chain HL | 147.1           |
| SC39-4 Chain AB | 145.6           |
| SC39-4 Chain HL | 144.8           |
| SC44-8 Chain HL | 142.3           |
| SC56-2 Chain HL | 150.6           |

<sup>#</sup> Elbow angle is the angle formed by heavy chain ( $V_H$  and  $C_{H1}$ ) and light chain ( $V_L$  and  $C_L$ ) domains along their pseudo-dyad axes (4).

**Table S4. Molecular surface area buried on peptide by Fab binding (Å<sup>2</sup>)**

|        | <b>Asn-2</b> | <b>Ile-3</b> | <b>Ile-4</b> | <b>1-pTza-5</b> | <b>Gly-6</b> | <b>Ser-7</b> |              |              | Total |
|--------|--------------|--------------|--------------|-----------------|--------------|--------------|--------------|--------------|-------|
| SC1-1  |              | 49           | 63.1         | 149             | 23           | 6            |              |              | 290   |
| SC50-3 | 5.7          | 53           | 54           | 152             | 20           | 4            |              |              | 288   |
|        |              | <b>Ala-3</b> | <b>Gly-4</b> | <b>3-pTza-5</b> | <b>Ala-6</b> | <b>Gly-7</b> | <b>Ala-8</b> | <b>Gly-9</b> |       |
| SC39-4 |              |              | 14           | 143             | 38           | 21           |              |              | 216   |
| SC44-8 |              | 32           | 31           | 136             | 64           | 50           | 23           | 37           | 372   |
| SC56-2 |              | 9            | 33           | 152             | 39           | 21           |              |              | 254   |



**Table S5. Hydrogen bond interactions between pHis Fabs and bound peptides**

| pHis Fab         | pHis Fab           |       | Peptide           |       | Distance*<br>(Å) | Angle@<br>(°)      |
|------------------|--------------------|-------|-------------------|-------|------------------|--------------------|
|                  | Residue            | Atoms | Residue           | Atoms |                  |                    |
| SC1-1            | A53 <sub>H</sub>   | N     | Phosphate of pTza | O2    | 2.79             | 166.2              |
|                  | Y58 <sub>H</sub>   | OH    | Phosphate of pTza | O3    | 2.65             | 167.9              |
|                  | R95 <sub>H</sub>   | NH1   | Phosphate of pTza | O2    | 2.79             | 161.5              |
|                  | R95 <sub>H</sub>   | NH2   | Phosphate of pTza | O3    | 2.9              | 176.1              |
|                  | S94 <sub>L</sub>   | OG    | Phosphate of pTza | O4    | 2.62             | 130.2              |
|                  | S100A <sub>H</sub> | OG    | Triazolyl ring    | NE2   | 2.67             | 102.6 <sup>#</sup> |
|                  | Y91 <sub>L</sub>   | OH    | Triazolyl ring    | ND2   | 3.5              | 97.3 <sup>#</sup>  |
|                  | Y91 <sub>L</sub>   | OH    | 1-pTza-5          | N     | 3.38             | 155.0 <sup>#</sup> |
|                  | S94 <sub>L</sub>   | N     | Ile-3             | O     | 2.67             | 169.6              |
| SC50-3           | A53 <sub>H</sub>   | N     | Phosphate of pTza | O2    | 2.76             | 158.1              |
|                  | Y58 <sub>H</sub>   | OH    | Phosphate of pTza | O3    | 2.45             | 154.6              |
|                  | R95 <sub>H</sub>   | NH1   | Phosphate of pTza | O3    | 3.16             | 165.7              |
|                  | R95 <sub>H</sub>   | NH2   | Phosphate of pTza | O2    | 2.75             | 157.9              |
|                  | S94 <sub>L</sub>   | OG    | Phosphate of pTza | O4    | 2.6              | 176.1              |
|                  | S100A <sub>H</sub> | OG    | Triazolyl ring    | NE2   | 2.88             | 105.3 <sup>#</sup> |
|                  | Y91 <sub>L</sub>   | OH    | Triazolyl ring    | ND2   | 3.48             | 99.6 <sup>#</sup>  |
|                  | Y91 <sub>L</sub>   | OH    | 1-pTza-5          | N     | 3.43             | 157.4 <sup>#</sup> |
|                  | Y28 <sub>L</sub>   | OH    | Asp-8             | O     | 3.8              | 107.0              |
| S94 <sub>L</sub> | N                  | Ile-3 | O                 | 2.92  | 171.8            |                    |
| SC39-4           | N33 <sub>H</sub>   | ND2   | Phosphate of pTza | O4    | 2.85             | 170.1              |
|                  | W50 <sub>H</sub>   | NE1   | Phosphate of pTza | O4    | 3.01             | 157.9              |
|                  | S95 <sub>H</sub>   | OG    | Phosphate of pTza | O4    | 2.59             | 165.6              |
|                  | D97 <sub>H</sub>   | N     | Phosphate of pTza | O1    | 2.81             | 154.5              |
|                  | G98 <sub>H</sub>   | N     | Phosphate of pTza | O3    | 3.15             | 174.5              |
|                  | N91 <sub>L</sub>   | ND2   | Phosphate of pTza | O3    | 2.9              | 154.6              |

|        |                  |     |                   |     |      |                    |
|--------|------------------|-----|-------------------|-----|------|--------------------|
|        | N91 <sub>L</sub> | O   | Triazolyl ring    | NG  | 3.43 | 171.2 <sup>#</sup> |
|        | N94 <sub>L</sub> | ND2 | Gly-4             | O   | 3.0  | 166.4              |
|        | N94 <sub>L</sub> | N   | 3-pTza-5          | O   | 2.88 | 155.2              |
|        | R95 <sub>L</sub> | NH2 | Ala-6             | O   | 2.94 | 134.1              |
| SC44-8 | K94 <sub>H</sub> | NZ  | Phosphate of pTza | O4  | 2.7  | 141.3              |
|        | G96 <sub>H</sub> | N   | Phosphate of pTza | O4  | 3.05 | 139.4              |
|        | S97 <sub>H</sub> | N   | Phosphate of pTza | O3  | 2.99 | 140.0              |
|        | S97 <sub>H</sub> | OG  | Phosphate of pTza | O3  | 2.64 | 171.1              |
|        | G98 <sub>H</sub> | N   | Phosphate of pTza | O1  | 3.07 | 171.2              |
|        | N99 <sub>H</sub> | ND2 | Phosphate of pTza | O1  | 2.62 | 166.2              |
|        | Y96 <sub>L</sub> | OH  | Phosphate of pTza | O3  | 2.72 | 169.6              |
|        | Y50 <sub>H</sub> | OH  | Triazolyl ring    | NG  | 3.29 | 132 <sup>#</sup>   |
|        | N99 <sub>H</sub> | ND2 | Triazolyl ring    | NE1 | 3.4  | 108.0              |
|        | H91 <sub>L</sub> | NE2 | Triazolyl ring    | NG  | 3.8  | 111.5              |
|        | R56 <sub>H</sub> | NH2 | Gly-7             | O   | 3.6  | 131.2              |
|        | N99 <sub>H</sub> | ND2 | Gly-4             | O   | 3.43 | 154.5              |
|        | W28 <sub>L</sub> | NE1 | Ala-3             | O   | 2.89 | 155.5              |
|        | N32 <sub>L</sub> | ND2 | Gly-4             | O   | 2.98 | 153.5              |
|        | H91 <sub>L</sub> | NE2 | Ala-6             | N   | 3.02 | 112.8 <sup>#</sup> |
|        | S94 <sub>L</sub> | O   | Gly-7             | N   | 2.97 | 166.3              |
|        | E95 <sub>L</sub> | O   | Gly-9             | N   | 2.67 | 133.2              |
| SC56-2 | K94 <sub>H</sub> | NZ  | Phosphate of pTza | O3  | 2.92 | 160.3              |
|        | G96 <sub>H</sub> | N   | Phosphate of pTza | O3  | 3.0  | 145.0              |
|        | S97 <sub>H</sub> | N   | Phosphate of pTza | O1  | 2.84 | 152.8              |
|        | V98 <sub>H</sub> | N   | Phosphate of pTza | O4  | 3.08 | 178.7              |
|        | S99 <sub>H</sub> | N   | Phosphate of pTza | O4  | 2.93 | 159.9              |
|        | S99 <sub>H</sub> | OG  | Phosphate of pTza | O4  | 2.88 | 152.4              |
|        | Y96 <sub>L</sub> | OH  | Phosphate of pTza | O1  | 2.77 | 163.8              |
|        | Y50 <sub>H</sub> | OH  | Triazolyl ring    | NG  | 3.39 | 137.8 <sup>#</sup> |
|        | S99 <sub>H</sub> | OG  | Triazolyl ring    | NE1 | 3.21 | 154.5 <sup>#</sup> |

|  |                  |     |          |   |      |       |
|--|------------------|-----|----------|---|------|-------|
|  | H52 <sub>H</sub> | NE2 | 3-pTza-5 | O | 2.96 | 156.6 |
|  | Y91 <sub>L</sub> | OH  | 3-pTza-5 | O | 2.75 | 146.4 |
|  | N32 <sub>L</sub> | ND2 | Gly-4    | O | 3.0  | 163.7 |

\* Hydrogen bond distance between donor and acceptor atoms < 3.9 Å

@ >90.0° for the angle made by donor, hydrogen and acceptor atoms

# >90.0° for the angle made by donor, acceptor and acceptor antecedent atoms or angle made by hydrogen, acceptor and acceptor antecedent atoms.

**Table S6. Classification of CDRs of pHis Fabs by PyIgClassify**

|        | CDRH1   | CDRH2  | CDRH3   | CDRL1   | CDRL2  | CDRL3       |
|--------|---------|--------|---------|---------|--------|-------------|
| SC1-1  | H1-13-4 | H2-9-1 | H3-14-4 | L1-13-2 | L2-8-1 | L3-12-1     |
| SC50-3 | H1-13-4 | H2-9-1 | H3-14-4 | L1-13-2 | L2-8-1 | L3-12-1     |
| SC39-4 | H1-13-1 | H2-9-1 | H3-9-2  | L1-11-1 | L2-8-1 | L3-13-1     |
| SC44-8 | H1-13-1 | H2-9-1 | H3-11-2 | L1-13-2 | L2-8-1 | L3-13-1     |
| SC56-2 | H1-13-1 | H2-9-1 | H3-11-2 | L1-13-2 | L2-8-1 | Not defined |

**Table S7. Kinetic data of pHis Fabs with pHis peptides**

| Fab    | ACLY                                               | NM23                                               | SCS                                                | Common-His                                         |
|--------|----------------------------------------------------|----------------------------------------------------|----------------------------------------------------|----------------------------------------------------|
| SC50-3 | $K_D: 1.94 \times 10^{-7} \pm 2.68 \times 10^{-9}$ | $K_D: 3.62 \times 10^{-7} \pm 4.38 \times 10^{-9}$ | $K_D: 4.11 \times 10^{-7} \pm 5.4 \times 10^{-9}$  | $K_D: 3.36 \times 10^{-7} \pm 4.22 \times 10^{-9}$ |
|        | $k_a: 1.27 \times 10^5 \pm 1.47 \times 10^3$       | $k_a: 4.85 \times 10^4 \pm 4.71 \times 10^2$       | $k_a: 3.58 \times 10^4 \pm 3.73 \times 10^2$       | $k_a: 7.22 \times 10^4 \pm 7.74 \times 10^2$       |
|        | $k_d: 2.47 \times 10^{-2} \pm 1.88 \times 10^{-4}$ | $k_d: 1.76 \times 10^{-2} \pm 1.26 \times 10^{-4}$ | $k_d: 1.47 \times 10^{-2} \pm 1.17 \times 10^{-4}$ | $k_d: 2.43 \times 10^{-2} \pm 1.58 \times 10^{-4}$ |
| SC39-4 | $K_D: 1.42 \times 10^{-6} \pm 4.62 \times 10^{-8}$ | $K_D: 2.35 \times 10^{-6} \pm 4.62 \times 10^{-8}$ | $K_D: 2.32 \times 10^{-6} \pm 6.31 \times 10^{-8}$ | $K_D: 3.29 \times 10^{-6} \pm 1.09 \times 10^{-7}$ |
|        | $k_a: 7.22 \times 10^4 \pm 7.74 \times 10^2$       | $k_a: 5.14 \times 10^4 \pm 1.54 \times 10^3$       | $k_a: 2.24 \times 10^4 \pm 5.32 \times 10^2$       | $k_a: 1.38 \times 10^4 \pm 3.93 \times 10^2$       |
|        | $k_d: 2.43 \times 10^{-2} \pm 1.58 \times 10^{-4}$ | $k_d: 7.3 \times 10^{-2} \pm 9.47 \times 10^{-4}$  | $k_d: 5.21 \times 10^{-2} \pm 6.9 \times 10^{-4}$  | $k_d: 4.54 \times 10^{-2} \pm 7.81 \times 10^{-4}$ |
| SC44-8 | $K_D: 3.48 \times 10^{-7} \pm 7.07 \times 10^{-9}$ | $K_D: \text{No binding}$                           | $K_D: 4.67 \times 10^{-7} \pm 3.57 \times 10^{-9}$ | $K_D: \text{No binding}$                           |
|        | $k_a: 2.8 \times 10^4 \pm 4.49 \times 10^2$        | $k_a: \text{No binding}$                           | $k_a: 2.93 \times 10^4 \pm 1.95 \times 10^2$       | $k_a: \text{No binding}$                           |
|        | $k_d: 9.72 \times 10^{-3} \pm 1.2 \times 10^{-4}$  | $k_d: \text{No binding}$                           | $k_d: 1.37 \times 10^{-2} \pm 5.18 \times 10^{-5}$ | $k_d: \text{No binding}$                           |
| SC56-2 | $K_D: 3.01 \times 10^{-6} \pm 8.08 \times 10^{-8}$ | $K_D: 5.7 \times 10^{-6} \pm 1.86 \times 10^{-7}$  | $K_D: 6.2 \times 10^{-6} \pm 2.15 \times 10^{-7}$  | $K_D: 3.6 \times 10^{-6} \pm 1.4 \times 10^{-7}$   |
|        | $k_a: 5.01 \times 10^4 \pm 1.24 \times 10^3$       | $k_a: 2.22 \times 10^4 \pm 6.6 \times 10^2$        | $k_a: 2.2 \times 10^4 \pm 7.1 \times 10^2$         | $k_a: 3.56 \times 10^4 \pm 1.24 \times 10^3$       |
|        | $k_d: 1.5 \times 10^{-1} \pm 1.6 \times 10^{-3}$   | $k_d: 1.26 \times 10^{-1} \pm 1.7 \times 10^{-3}$  | $k_d: 1.36 \times 10^{-1} \pm 1.81 \times 10^{-3}$ | $k_d: 1.27 \times 10^{-1} \pm 2.19 \times 10^{-3}$ |

**Table S8. Applications of pHis antibodies**

| System under study                               | Application using pHis antibodies                                                                                                                                                                                                                                                                                                                                      | Reference |
|--------------------------------------------------|------------------------------------------------------------------------------------------------------------------------------------------------------------------------------------------------------------------------------------------------------------------------------------------------------------------------------------------------------------------------|-----------|
| KCa3.1 ion channel                               | 3-pHis mAbs were used to show that pHis358 in the KCa3.1 ion channel is a 3-pHis isoform and is essential for relief from copper-mediated inhibition thus allowing increased calcium flux into CD4 <sup>+</sup> T cells enhancing cytokine production.                                                                                                                 | (5)       |
| NME1 in Triple negative breast cancer            | 1-pHis mAbs were used to demonstrate the relationship between the phosphorylated <i>versus</i> non-phosphorylated NME and its enzymatic activity in regulation of tumor cell motility in triple-negative breast cancer cell lines                                                                                                                                      | (6)       |
| FAK in esophageal squamous cell carcinoma (ESCC) | pHis mAbs were used to show that pHis58 in FAK is associated with glucose-induced, growth factor-independent proliferation (GFIP) and resistance to therapies that target growth factor signaling.                                                                                                                                                                     | (7)       |
| NAMPT from NAD <sup>+</sup> salvage pathway      | 1-pHis antibodies were used to study the effect of the nicotinamide phosphoribosyltransferase (NAMPT) activator on the enzymatic activity of NAMPT, which is involved in cell signaling, DNA repair, cell division and epigenetics in mammalian cells.                                                                                                                 | (8)       |
| mTOR-driven hepatocellular carcinoma             | The pHis mAbs were used to study the role of deregulated histidine phosphorylation in tumorigenesis in an HCC mouse model. Elevated levels of the NME1 and NME2 histidine kinases, and decreased levels of the LHPP pHis phosphatase, correlated with increased tumor severity and reduced overall survival, thus establishing LHPP as the novel tumor suppressor gene | (9)       |
| CusS/CusR two component system in E. coli        | Autophosphorylation assay with the pHis mAbs established kinetics and assigned the site of phosphorylation to the N1 position on H271 on CusS.                                                                                                                                                                                                                         | (10)      |

**Table S9. Crystallization conditions**

| pHis Fab | Crystallization condition                                                   | Cryoprotectant       |
|----------|-----------------------------------------------------------------------------|----------------------|
| SC1-1    | 35 % 2-methyl-2,4-pentanediol<br>0.1 M MES pH 6.29<br>0.2 M Lithium sulfate | Well solution        |
| SC50-3   | 1.8 M Ammonium sulfate<br>0.1 M Sodium citrate pH 5.5                       | 30 % Ethylene glycol |
| SC39-4   | 0.1 M Sodium acetate pH 4.5<br>20 % PEG3000                                 | 30 % Ethylene glycol |
| SC44-8   | 0.1 M Bicine pH 9.0<br>30 % PEG6000                                         | 25 % PEG200          |
| SC56-2   | 0.1 M Sodium cacodylate pH 6.5<br>1 M Sodium citrate                        | 30 % PEG200          |

## Supplementary references

1. S. R. Fuhs *et al.*, Monoclonal 1- and 3-phosphohistidine antibodies: New tools to study histidine phosphorylation. *Cell* **162**, 198-210 (2015).
2. Y. F. Wei, H. R. Matthews, Identification of phosphohistidine in proteins and purification of protein-histidine kinases. *Methods Enzymol.* **200**, 388-414 (1991).
3. I. K. McDonald, J. M. Thornton, Satisfying hydrogen bonding potential in proteins. *J. Mol. Biol.* **238**, 777-793 (1994).
4. R. L. Stanfield, A. Zemla, I. A. Wilson, B. Rupp, Antibody elbow angles are influenced by their light chain class. *J. Mol. Biol.* **357**, 1566-1574 (2006).
5. S. Srivastava *et al.*, Histidine phosphorylation relieves copper inhibition in the mammalian potassium channel KCa3.1. *eLife* **5**, e16093 (2016).
6. I. Khan, P. S. Steeg, The relationship of NM23 (NME) metastasis suppressor histidine phosphorylation to its nucleoside diphosphate kinase, histidine protein kinase and motility suppression activities. *Oncotarget* **9**, 10185-10202 (2018).
7. J. Zhang *et al.*, Glucose drives growth factor-independent esophageal cancer proliferation via phosphohistidine-focal adhesion kinase signaling. *Cell Mol. Gastroenterol. Hepatol.* **8**, 37-60 (2019).
8. S. J. Gardell *et al.*, Boosting NAD<sup>+</sup> with a small molecule that activates NAMPT. *Nat. Commun.* **10**, 3241 (2019).
9. S. K. Hindupur *et al.*, The protein histidine phosphatase LHPP is a tumour suppressor. *Nature* **555**, 678-682 (2018).
10. T. Affandi, M. M. McEvoy, Mechanism of metal ion-induced activation of a two-component sensor kinase. *Biochem. J.* **476**, 115-135 (2019).
